# Supplementary material
Source: publisher site journal article supplement (https://www.spandidos-publications.com/6795/downloadSupplementary)
Supplement: Supplementary file 1 [file downloadSupplementary]

## Sheet: Sheet1
Table SII. Small RNA sequencing in normal and patient samples.
	Sample ID	Source	Type	Total sequenced reads	Number of reads after quality filtering	Total number of uniquely mapped reads (hg19)	Ratio (%) of uniquely mapped reads to total reads
	R-2-N	Tissue	Normal	28324157	1649396	1334354	80.8996
	R-30-N	Tissue	Normal	65682547	4483583	3989499	88.9802
	S-144-N	Tissue	Normal	50287076	2937329	2583241	87.9452
	S-156-N	Tissue	Normal	51599906	1727858	1391276	80.5203
	S-71-N	Tissue	Normal	29879591	995662	808362	81.1884
	CN-1-T	Tissue	Tumor	53416406	2433501	2060614	84.6769
	S-113-T	Tissue	Tumor	46519166	3825776	3219270	84.1469
	S-156-T	Tissue	Tumor	60805043	2540702	2092189	82.3469
	S-158-T	Tissue	Tumor	53301887	2645371	2166139	81.8841
	S-166-T	Tissue	Tumor	54977067	2416756	1999209	82.7228
	N-12	Plasma	normal	54308685	1810280	702003	38.7787
	N-15	Plasma	normal	74052453	1297450	773664	59.6296
	N-16	Plasma	normal	47258687	667113	245708	36.8315
	N-17	Plasma	normal	55390099	2451418	335501	13.686
	N-19	Plasma	normal	61777037	1103203	594785	53.9144
	N-1	Plasma	normal	16352343	12110	597	4.92981
	N-20	Plasma	normal	56992689	506424	61748	12.1929
	N-21	Plasma	normal	45287412	743632	374266	50.3295
	N-22	Plasma	normal	71296188	1445770	1015228	70.2206
	N-3	Plasma	normal	10634468	14630	722	4.93506
	N-4	Plasma	normal	5701482	292052	102309	35.0311
	N-5	Plasma	normal	6242063	152321	69417	45.5728
	N-6	Plasma	normal	12397754	524110	237392	45.2943
	N-7	Plasma	normal	4915241	421091	39876	9.46969
	N-8	Plasma	normal	15795507	710570	472372	66.4779
	N-9	Plasma	normal	14119895	714365	186984	26.1749
	S-110	Plasma	CP	18113856	825598	491969	59.5894
	S-118	Plasma	CP	10409570	450953	168036	37.2624
	S-126	Plasma	CP	10461129	594733	68172	11.4626
	S-129	Plasma	CP	14041131	404172	168830	41.7718
	S-27	Plasma	CP	8661130	234860	121689	51.8134
	S-31	Plasma	CP	16921899	656189	385097	58.6869
	S-59	Plasma	CP	19412198	489267	133485	27.2826
	S-86	Plasma	CP	13070285	459859	170693	37.1186
	S-108-T	Plasma	tumor	9196856	360850	146541	40.6099
	CN-1	Plasma	tumor	48820618	1669259	660872	39.5907
	S-113	Plasma	tumor	13480122	4379262	1217403	27.7993
	S-128-T	Plasma	tumor	10560389	442849	207257	46.8008
	S-133-T	Plasma	tumor	6154528	435631	97760	22.441
	S-134-T	Plasma	tumor	12384650	635687	102018	16.0485
	S-156	Plasma	tumor	69041242	2139581	838937	39.2103
	S-158	Plasma	tumor	64168079	1601544	717697	44.8128
	S-161	Plasma	tumor	83211452	3802641	1328070	34.9249
	S-42-T	Plasma	tumor	7347500	213846	27922	13.0571
	S-44	Plasma	tumor	47305755	988909	338385	34.218
	S-45	Plasma	tumor	38491494	892145	290550	32.5676
	S-52	Plasma	tumor	92692932	2898478	1609864	55.5417
	S-61-T	Plasma	tumor	14327625	628331	271872	43.2689
	S-71-T	Plasma	tumor	3292003	129910	58843	45.2952
